# Supplementary material
Source: publisher figshare collection journal article supplement (https://sage.figshare.com/ndownloader/files/14639780)
Supplement: Supplementary file 1 [file 14639780]

## **SUPPLEMENTAL MATERIAL**

**eTable1: Study medication (fasiglifam, placebo or active drug) stopping criteria**

| Stopping criteria                                                                                                                                                                                                                                                                     |                                                                                                                                                                                                                                                                                                                                                                                                                                                                                                                                                                                                                                  |                                                              |                                                                                                                                                                                                                                                                                                                                                                                                                                                                                                                   |
|---------------------------------------------------------------------------------------------------------------------------------------------------------------------------------------------------------------------------------------------------------------------------------------|----------------------------------------------------------------------------------------------------------------------------------------------------------------------------------------------------------------------------------------------------------------------------------------------------------------------------------------------------------------------------------------------------------------------------------------------------------------------------------------------------------------------------------------------------------------------------------------------------------------------------------|--------------------------------------------------------------|-------------------------------------------------------------------------------------------------------------------------------------------------------------------------------------------------------------------------------------------------------------------------------------------------------------------------------------------------------------------------------------------------------------------------------------------------------------------------------------------------------------------|
| For all trials except TAK 875_306                                                                                                                                                                                                                                                     | <ul style="list-style-type: none"><li>- ALT or AST &gt; 8x ULN</li><li>- ALT or AST &gt; 5x ULN for &gt; 2 weeks</li><li>- ALT or AST &gt; 3x ULN and (total bilirubin [TBL] &gt; 2xULN or international normalized ratio [INR] &gt;1.5xULN)</li><li>- ALT or AST &gt; 3xULN with the appearance of worsening of fatigue, nausea, vomiting, right upper quadrant pain or tenderness, fever, rash and/or eosinophilia (&gt;5%)</li><li>- Elevation of TBL &gt;2.0xULN on repeated testing after initial TBL &gt; 2.0x ULN</li><li>- Elevation of ALP to ≥ 3xULN on repeat testing after initial ALP elevation ≥ 1.5xULN</li></ul> | TAK 875_306                                                  |                                                                                                                                                                                                                                                                                                                                                                                                                                                                                                                   |
|                                                                                                                                                                                                                                                                                       |                                                                                                                                                                                                                                                                                                                                                                                                                                                                                                                                                                                                                                  | Normal or elevated ALT or AST at baseline (all participants) | - ALT or AST >8x ULN                                                                                                                                                                                                                                                                                                                                                                                                                                                                                              |
|                                                                                                                                                                                                                                                                                       |                                                                                                                                                                                                                                                                                                                                                                                                                                                                                                                                                                                                                                  | Normal ALT or AST at baseline                                | <ul style="list-style-type: none"><li>- ALT or AST &gt;5x ULN and persists for more than 2 weeks</li><li>- ALT or AST &gt;3x ULN in conjunction with elevated total bilirubin &gt;2x ULN or INR &gt;1.5</li><li>- ALT or AST &gt;3x ULN with appearance of fatigue, nausea, vomiting, right upper quadrant pain or tenderness, fever, rash and/or eosinophilia (&gt;5%)</li></ul>                                                                                                                                 |
|                                                                                                                                                                                                                                                                                       |                                                                                                                                                                                                                                                                                                                                                                                                                                                                                                                                                                                                                                  | Elevated ALT or AST at baseline                              | <ul style="list-style-type: none"><li>- ALT or AST &gt;5x ULN and 2-fold increases above baseline values and persists for more than 2 weeks</li><li>- ALT or AST &gt;5x ULN and 2-fold increases above baseline values in conjunction with elevated total bilirubin &gt;2 ULN or INR &gt;1.5</li><li>- ALT or AST &gt;5x ULN and 2-fold increases above baseline values with appearance of fatigue, nausea, vomiting, right upper quadrant pain or tenderness, fever, rash and/or eosinophilia (&gt;5%)</li></ul> |
| Additional criteria for study medication withdrawal: <ul style="list-style-type: none"><li>– Elevation of TBL &gt;2.0xULN on repeated testing after initial TBL &gt; 2.0x ULN</li><li>– Elevation of ALP to ≥ 3xULN on repeat testing after initial ALP elevation ≥ 1.5xULN</li></ul> |                                                                                                                                                                                                                                                                                                                                                                                                                                                                                                                                                                                                                                  |                                                              |                                                                                                                                                                                                                                                                                                                                                                                                                                                                                                                   |

**eTable 2: Summary of liver toxicity in the eight clinical trials within the fasiglifam development program**

| Study | Parameter                                | Fasiglifam<br>25mg<br>n (%) | Fasiglifam<br>50mg<br>n (%) | Placebo<br>n (%) | Glimepiride<br>n (%) | Sitagliptin<br>n (%) |
|-------|------------------------------------------|-----------------------------|-----------------------------|------------------|----------------------|----------------------|
| 301   | Randomized as of cut off                 | 137                         | 141                         | 143              |                      |                      |
|       | Safety population                        | 137 (100%)                  | 141 (100%)                  | 143 (100%)       |                      |                      |
|       | Median duration of drug exposure, months | 5.7 (5.6, 5.7)              | 5.6 (5.6, 5.7)              | 5.7 (5.6, 5.7)   |                      |                      |
|       | Duration of exposure (patient-years)     | 61.5                        | 61.8                        | 63.4             |                      |                      |
|       | ALT or AST >3xULN                        | 5 (3.6%)                    | 4 (2.8%)                    | 1 (0.7%)         |                      |                      |
|       | ALT or AST >5xULN                        | 1 (0.7%)                    | 3 (2.1%)                    | 0                |                      |                      |
|       | ALT or AST >8xULN                        | 1 (0.7%)                    | 2 (1.4%)                    | 0                |                      |                      |
|       | ALT or AST >10xULN                       | 1 (0.7%)                    | 2 (1.4%)                    | 0                |                      |                      |
|       | Hy's Law Cases                           | 0                           | 0                           | 0                |                      |                      |
| 302   | Randomized as of cut off                 | 262                         | 261                         | 132              |                      | 260                  |
|       | Safety population                        | 259 (100%)                  | 261 (100%)                  | 131 (100%)       |                      | 260 (100%)           |
|       | Median duration of drug exposure, months | 5.6 (2.9, 7.0)              | 5.6 (2.7, 7.0)              | 5.6 (2.3, 7.1)   |                      | 5.6 (2.8, 7.7)       |
|       | Duration of exposure (patient-years)     | 119.7                       | 117.1                       | 57.7             |                      | 124.8                |
|       | ALT or AST >3xULN                        | 8 (3.1%)                    | 4 (1.5%)                    | 3 (2.3%)         |                      | 4 (1.5%)             |
|       | ALT or AST >5xULN                        | 4 (1.5%)                    | 2 (0.8%)                    | 0                |                      | 2 (0.8%)             |
|       | ALT or AST >8xULN                        | 2 (0.8%)                    | 2 (0.8%)                    | 0                |                      | 2 (0.8%)             |
|       | ALT or AST >10xULN                       | 1 (0.4%)                    | 2 (0.8%)                    | 0                |                      | 1 (0.4%)             |
|       | Hy's Law Cases                           | 0                           | 0                           | 0                |                      | 2 (0.8%)             |
| 303   | Randomized as of cut off                 | 31                          | 29                          | 30               |                      |                      |
|       | Safety population                        | 31 (100%)                   | 29 (100%)                   | 30 (100%)        |                      |                      |
|       | Median duration of drug exposure, months | 2.8 (0.9, 3.8)              | 2.1 (1.0, 3.1)              | 2.2 (0.8, 3.8)   |                      |                      |
|       | Duration of exposure (patient-years)     | 6.3                         | 5.7                         | 6.0              |                      |                      |
|       | ALT or AST >3xULN                        | 0                           | 0                           | 0                |                      |                      |
|       | ALT or AST >5xULN                        | 0                           | 0                           | 0                |                      |                      |
|       | ALT or AST >8xULN                        | 0                           | 0                           | 0                |                      |                      |
|       | ALT or AST >10xULN                       | 0                           | 0                           | 0                |                      |                      |
|       | Hy's Law Cases                           | 0                           | 0                           | 0                |                      |                      |
| 304   | Randomized as of cut off                 | 817                         | 813                         |                  | 824                  |                      |
|       | Safety population                        | 817 (100%)                  | 813 (100%)                  |                  | 824 (100%)           |                      |
|       | Median duration of drug exposure         | 10.8 (6.5, 14.3)            | 10.8 (6.2, 13.9)            |                  | 10.8 (6.2, 13.9)     |                      |
|       | Duration of exposure (patient-years)     | 716.0                       | 699.4                       |                  | 708.8                |                      |
|       | ALT or AST >3xULN                        | 29 (3.5%)                   | 44 (5.4%)                   |                  | 10 (1.2%)            |                      |
|       | ALT or AST >5xULN                        | 10 (1.2%)                   | 18 (2.2%)                   |                  | 3 (0.4%)             |                      |
|       | ALT or AST >8xULN                        | 5 (0.6%)                    | 7 (0.9%)                    |                  | 1 (0.1%)             |                      |
|       | ALT or AST >10xULN                       | 3 (0.4%)                    | 6 (0.7%)                    |                  | 1 (0.1%)             |                      |
|       | Hy's Law Cases                           | 0                           | 2 (0.2%)                    |                  | 0                    |                      |

|     |                                          |                |                 |                 |                |  |
|-----|------------------------------------------|----------------|-----------------|-----------------|----------------|--|
| 306 | Randomized as of cut off                 |                | 1599            | 1602            |                |  |
|     | Safety population                        |                | 1597 (100%)     | 1602 (100%)     |                |  |
|     | Median duration of drug exposure, months |                | 9.3 (4.2, 11.3) | 9.3 (4.1, 11.5) |                |  |
|     | Duration of exposure (patient-years)     |                | 1104.8          | 1110.6          |                |  |
|     | ALT or AST >3xULN                        |                | 35 (2.2%)       | 10 (0.6%)       |                |  |
|     | ALT or AST >5xULN                        |                | 22 (1.4%)       | 2 (0.1%)        |                |  |
|     | ALT or AST >8xULN                        |                | 11 (0.7%)       | 1 (0.1%)        |                |  |
|     | ALT or AST >10xULN                       |                | 9 (0.6%)        | 1 (0.1%)        |                |  |
|     | Hy's Law Cases                           |                | 0               | 0               |                |  |
| 307 | Randomized as of cut off                 | 131            | 130             | 131             |                |  |
|     | Safety population                        | 130 (100%)     | 130 (100%)      | 131 (100%)      |                |  |
|     | Median duration of drug exposure, months | 4.6 (1.9, 5.6) | 4.7 (2.0, 5.6)  | 4.3 (1.2, 5.6)  |                |  |
|     | Duration of exposure (patient-years)     | 41.3           | 41.5            | 38.7            |                |  |
|     | ALT or AST >3xULN                        | 1 (0.8%)       | 4 (3.1%)        | 1 (0.8%)        |                |  |
|     | ALT or AST >5xULN                        | 1 (0.8%)       | 3 (2.3%)        | 0               |                |  |
|     | ALT or AST >8xULN                        | 1 (0.8%)       | 3 (2.3%)        | 0               |                |  |
|     | ALT or AST >10xULN                       | 1 (0.8%)       | 3 (2.3%)        | 0               |                |  |
|     | Hy's Law Cases                           | 1 (0.8%)       | 2 (1.5%)        | 0               |                |  |
| 309 | Randomized as of cut off                 |                | 16              | 17              |                |  |
|     | Safety population                        |                | 16 (100%)       | 17 (100%)       |                |  |
|     | Median duration of drug exposure, months |                | 0.9 (0.6, 1.6)  | 1.3 (0.9, 2.1)  |                |  |
|     | Duration of exposure (patient-years)     |                | 1.8             | 2.6             |                |  |
|     | ALT or AST >3xULN                        |                | 0               | 0               |                |  |
|     | ALT or AST >5xULN                        |                | 0               | 0               |                |  |
|     | ALT or AST >8xULN                        |                | 0               | 0               |                |  |
|     | ALT or AST >10xULN                       |                | 0               | 0               |                |  |
|     | Hy's Law Cases                           |                | 0               | 0               |                |  |
| 310 | Randomized as of cut off                 |                | 50              |                 | 46             |  |
|     | Safety population                        |                | 50 (100%)       |                 | 46 (100%)      |  |
|     | Median duration of drug exposure, months |                | 2.0 (1.0, 2.9)  |                 | 2.2 (1.1, 4.5) |  |
|     | Duration of exposure (patient-years)     |                | 9.2             |                 | 9.8            |  |
|     | ALT or AST >3xULN                        |                | 0               |                 | 0              |  |
|     | ALT or AST >5xULN                        |                | 0               |                 | 0              |  |
|     | ALT or AST >8xULN                        |                | 0               |                 | 0              |  |
|     | ALT or AST >10xULN                       |                | 0               |                 | 0              |  |
|     | Hy's Law Cases                           |                | 0               |                 | 0              |  |

Samples sizes for studies 301, 302, 303, 304, 306, 307, 309 and 310 based on IVRS data as of cut-off 10Feb2014

Hy's Law cases are defined as ALT or AST > 3x ULN with bilirubin > 2x ULN in the absence of cholestasis and an alternative explanation

ALT indicates alanine transaminase, AST aspartate transaminase, ULN upper limit normal

**eTable 3: Summary of the major adverse cardiovascular event composite and all-cause death**

| Parameter                 | Study | Active Control / Placebo |                    |                    |                  |                  |                    | RR <sup>B</sup><br>(95%CI) |
|---------------------------|-------|--------------------------|--------------------|--------------------|------------------|------------------|--------------------|----------------------------|
|                           |       | Fasiglifam<br>25mg       | Fasiglifam<br>50mg | Placebo            | Glimepiride      | Sitagliptin      | Overall            |                            |
| MACE composite, n<br>(%)  | 301   | 0 / 0                    | 1 / 141<br>(0.7)   | 0 / 0              |                  |                  | 1 / 421<br>(0.2)   |                            |
|                           | 302   | 3 / 259<br>(1.2)         | 0 / 0              | 0 / 0              |                  | 0 / 0            | 3 / 911<br>(0.3)   |                            |
|                           | 303   | 0 / 0                    | 0 / 0              | 0 / 0              |                  |                  | 0 / 0              |                            |
|                           | 304   | 3 / 817<br>(0.4)         | 7 / 813<br>(0.9)   |                    | 7 / 824<br>(0.8) |                  | 17 / 2454<br>(0.7) |                            |
|                           | 306   |                          | 24 / 1597<br>(1.5) | 28 / 1602<br>(1.7) |                  |                  | 52 / 3199<br>(1.6) |                            |
|                           | 307   | 0 / 0                    | 0 / 0              | 1 / 131<br>(0.8)   |                  |                  | 1 / 391<br>(0.3)   |                            |
|                           | 309   |                          | 0 / 0              | 0 / 0              |                  |                  | 0                  |                            |
|                           |       |                          |                    |                    |                  |                  |                    |                            |
|                           | 310   |                          | 0 / 0              |                    |                  | 0 / 0            | 0 / 0              |                            |
|                           | Total | 6 / 1374<br>(0.4)        | 32 / 3037<br>(1.1) | 29 / 2054<br>(1.4) | 7 / 824<br>(0.8) | 0 / 0            | 74 / 7595<br>(1.0) | 0.76<br>(0.48, 1.20)       |
| All-cause death, n<br>(%) | 301   | 0 / 0                    | 1 / 141<br>(0.7)   | 0 / 0              |                  |                  | 1 / 421<br>(0.2)   |                            |
|                           | 302   | 0 / 0                    | 0 / 0              | 1 / 131<br>(0.8)   |                  | 1 / 260<br>(0.4) | 2 / 911<br>(0.2)   |                            |
|                           | 303   | 0 / 0                    | 0 / 0              | 0 / 0              |                  |                  | 0                  |                            |
|                           | 304   | 4 / 817<br>(0.5)         | 4 / 813<br>(0.5)   |                    | 5 / 824<br>(0.6) |                  | 13 / 2454<br>(0.5) |                            |
|                           | 306   |                          | 12 / 1597<br>(0.8) | 17 / 1602<br>(1.1) |                  |                  | 29 / 3199<br>(0.9) |                            |
|                           | 307   | 0 / 0                    | 1 / 130<br>(0.8)   | 0 / 0              |                  |                  | 1 / 391<br>(0.3)   |                            |
|                           | 309   |                          | 0 / 0              | 0 / 0              |                  |                  | 0 / 0              |                            |
|                           | 310   |                          | 0 / 0              |                    |                  | 0 / 0            | 0 / 0              |                            |
|                           | Total | 4 / 1374<br>(0.3)        | 18 / 3037<br>(0.6) | 18 / 2054<br>(0.9) | 5 / 824<br>(0.6) | 1 / 306<br>(0.3) | 46 / 7595<br>(0.6) | 0.66<br>(0.37, 1.18)       |

<sup>a</sup>Fasiglifam versus Active control / Placebo using Mantel-Haenszel method

MACE represents major adverse cardiovascular event (composite of cardiovascular death, nonfatal myocardial infarction, nonfatal stroke and hospitalization for unstable angina); RR, relative risk

ALT indicates alanine transaminase, AST aspartate transaminase, INR international normalized ratio, TBL, total bilirubin, ULN upper limit normal

**eTable 4: Summary of the accumulated liver function disorder cases adjudicated by the Liver Safety Evaluation Committee (LSEC)**

| Parameter                                      | Studies<br>301, 302, 303, 304,<br>306, 307, 309 & 310 |                             | Japan phase 3 studies<br>CCT-003, OCT-002 &<br>OCT-003<br>Fasiglifam 25mg & 50mg<br>(N=1681) | All Studies <sup>a</sup><br>Placebo or Other<br>Treatment<br>(N=3252) | Total<br>(N=9350) |
|------------------------------------------------|-------------------------------------------------------|-----------------------------|----------------------------------------------------------------------------------------------|-----------------------------------------------------------------------|-------------------|
|                                                | Fasiglifam-25mg<br>(N=1378)                           | Fasiglifam-50mg<br>(n=3039) |                                                                                              |                                                                       |                   |
| Number of hepatic disorder cases LSEC reviewed | 14 (1.02%)                                            | 39 (1.28%)                  | 14 (0.83%)                                                                                   | 8 (0.25%)                                                             | 75 (0.80%)        |
|                                                |                                                       |                             |                                                                                              |                                                                       |                   |
| LSEC Adjudication regarding DILI <sup>b</sup>  |                                                       |                             |                                                                                              |                                                                       |                   |
| Highly Likely                                  | 0                                                     | 1 (0.03%)                   | 0                                                                                            | 0                                                                     | 1 (0.01%)         |
| Probable                                       | 11 (0.80%)                                            | 24 (0.79%)                  | 3 (0.18%)                                                                                    | 2 (0.06%)                                                             | 40 (0.43%)        |
| Possible                                       | 2 (0.15%)                                             | 8 (0.26%)                   | 7 (0.42%)                                                                                    | 2 (0.06%)                                                             | 19 (0.20%)        |
| Excluded/Unrelated/Unlikely                    | 1 (0.07%)                                             | 6 (0.20%)                   | 4 (0.24%)                                                                                    | 4 (0.12%)                                                             | 15 (0.16%)        |

Sample size for the Japan studies are based on communication as of 22Oct2013. Samples sizes for studies 301, 302, 303, 304, 306, 307, 309 and 310 based on IVRS data as of cut-off 10Feb2014

N indicates number of participants randomized. The number of participants randomized in each treatment group (N) is used as the denominator for percentage calculations

<sup>a</sup> Includes Japan phase 3 studies

<sup>b</sup> DILI, indicates drug-induced liver injury
